# Supplementary material for: Diagnostic potential of a circulating miRNA model associated with therapeutic effect in heart failure
Source: Springer Nature journal article supplement (doi:10.1186/s12967-022-03465-w), 2022-06-11

## **Additional file 1**

**Table S1:** Characteristics of HF patients in the discovery phase (n=40).

**Table S2:** Characteristics of HF patients in the training phase (n=30) and validation phase (n=50).

**Table S3:** Home made circulating miRNA panel which was used for the miRNA screening analysis in the discovery phase.

**Table S4:** The features of 11 overlapped target genes of miR-30a-5p in Heart Failure (ICM or DCM).

**Table S5:** The features of 9 overlapped target genes of miR-654-5p between Heart Failure (ICM or DCM).

**Figure S1.** Expression patterns of circulating miR-100, miR-320a, miR-433 and miR-499b-3p in each patient in the discovery phase with paired plasma samples collected at times of check-in and check-out. The p-values showed significant change of the four miRNAs ( $p < 0.05$ ).

**Figure S2.** Expression patterns and change trends of the rest of 83 circulating miRNAs in all patients in the discovery phase. The p-values of these miRNAs did not show significant change.

**Figure S3.** Correlation analysis between miR-30a-5p, miR-654-5p and NT-proBNP in the 40 HF patients enrolled in the discovery phase before and after treatment.

**Figure S4.** Correlation analysis between the differential miRNA expression change and the NT-proBNP reduction by comparing 5 patients with ~80% NT-proBNP reduction and 5 patients with ~40% NT-proBNP reduction upon medical therapy (n=5, \* $p < 0.05$ ).

Table S1: Characteristics of HF patients in the discovery phase

| Characteristics                    | In-hospital           | Out-of hospital       | p     |
|------------------------------------|-----------------------|-----------------------|-------|
| Age (mean $\pm$ SD)                | 64.40 $\pm$ 11.88     | 64.40 $\pm$ 11.88     |       |
| Number (n)                         | 40                    | 40                    |       |
| LVEF (%)                           | 34.05 $\pm$ 5.77      |                       |       |
| <b><i>Physical examination</i></b> |                       |                       |       |
| Heart rate (bpm)                   | 82.62 $\pm$ 17.08     | 74.24 $\pm$ 11.71     | 0.02  |
| Systolic BP (mmHg)                 | 129.90 $\pm$ 22.68    | 112.92 $\pm$ 17.48    | <0.01 |
| Diastolic BP (mmHg)                | 76.62 $\pm$ 10.93     | 70.30 $\pm$ 8.98      | <0.01 |
| <b><i>Lab tests</i></b>            |                       |                       |       |
| cTnI (ng/mL)                       | 0.05 $\pm$ 0.04       | 0.05 $\pm$ 0.03       | 0.98  |
| CK-MB (ng/mL)                      | 2.91 $\pm$ 1.69       | 1.68 $\pm$ 0.83       | <0.01 |
| NT-proBNP (pg/mL)                  | 7803.00 $\pm$ 8271.15 | 2775.16 $\pm$ 2142.60 | <0.01 |

Table S2: Characteristics of HF patients in the training phases

| Characteristics                    | Training Phase  | Training Phase  |
|------------------------------------|-----------------|-----------------|
|                                    | Heart Failure   | Control         |
| Age (mean±SD)                      | 61.99±13.24     | 61.08±14.44     |
| Number (n)                         | 80              | 40              |
| LVEF (%)                           | 32.09±5.86      |                 |
| <b><i>Physical examination</i></b> |                 |                 |
| Heart rate (bpm)                   | 83.38±17.37     |                 |
| Systolic BP (mmHg)                 | 121.12±19.61    |                 |
| Diastolic BP (mmHg)                | 74.76±11.04     |                 |
| <b><i>Lab tests</i></b>            |                 |                 |
| cTnI (ng/mL)                       | 0.05±0.04       |                 |
| CK-MB (ng/mL)                      | 2.95±2.07       |                 |
| NT-proBNP (pg/mL)                  | 7040.86±7254.41 | 7118.92±7821.01 |
| <b><i>NYHA classification</i></b>  |                 |                 |
| Class I (n)                        | 0               |                 |
| Class II (n)                       | 25              |                 |
| Class III (n)                      | 42              |                 |
| Class IV (n)                       | 13              |                 |
| <b><i>Cardiomyopathy type</i></b>  |                 |                 |
| Ischemic cardiomyopathy (n)        | 21              |                 |
| Dilated cardiomyopathy (n)         | 42              |                 |
| Others (n)                         | 17              |                 |

Table S3: Home-made circulating miRNA panel

|   | 1          | 2          | 3          | 4          | 5          | 6        | 7        | 8          | 9          | 10          | 11          | 12          |
|---|------------|------------|------------|------------|------------|----------|----------|------------|------------|-------------|-------------|-------------|
| A | H2O        | 5s rRNA    | H2O        | miR-16     | let-7a     | let-7b   | let-7c   | let-7e     | let-7f     | let-7g      | let-7i      | miR-10a     |
| B | miR-15a    | miR-15b    | miR-17     | miR-18a    | miR-18b    | miR-19a  | miR-19b  | miR-20b    | miR-21     | miR-23a     | miR-24      | miR-26      |
| C | miR-27a    | miR-27b    | miR-29a    | miR-29b    | miR-30a-5p | miR-30d  | miR-92   | miR-93     | miR-99b    | miR-100     | miR-103a    | miR-106a    |
| D | miR-106b   | miR-122    | miR-125b   | miR-126    | miR-129    | miR-130a | miR-133a | miR-133b   | miR-136    | miR-140     | miR-143     | miR-145     |
| E | miR-150    | miR-151-5p | miR-155    | miR-181a   | miR-181b   | miR-182  | miR-191  | miR-195    | miR-199a   | miR-199a-3p | miR-208a    | miR-214     |
| F | miR-221    | miR-222    | miR-302a   | miR-302c   | miR-302d   | miR-302e | miR-320a | miR-320b   | miR-324-5p | miR-329     | miR-342     | miR-346     |
| G | miR-369-5p | miR-382    | miR-423-3p | miR-423-5p | miR-433    | miR-484  | miR-486  | miR-493    | miR-495    | miR-499a    | miR-499b-3p | miR-499b-5p |
| H | miR-543    | miR-622    | miR-638    | miR-654    | miR-665    | miR-675  | miR-762  | miR-885-5p | miR-16     | H2O         | 5s rRNA     | H2O         |

Table S4: The expression features of 11 overlapped target genes of miR-30a-5p

| <b>Gene</b> | <b>log2FC ICM<br/>Heart Failure -<br/>Non-Failing<br/>Postnatal</b> | <b>log2FC DCM<br/>Heart Failure -<br/>Non-Failing<br/>Postnatal</b> | <b>t-statistic ICM<br/>Heart Failure -<br/>Non-Failing<br/>Postnatal</b> | <b>t-statistic DCM<br/>Heart Failure -<br/>Non-Failing<br/>Postnatal</b> | <b>P Value ICM<br/>Heart Failure -<br/>Non-Failing<br/>Postnatal</b> | <b>P Value DCM<br/>Heart Failure -<br/>Non-Failing<br/>Postnatal</b> | <b>Ensembl GeneID</b> |
|-------------|---------------------------------------------------------------------|---------------------------------------------------------------------|--------------------------------------------------------------------------|--------------------------------------------------------------------------|----------------------------------------------------------------------|----------------------------------------------------------------------|-----------------------|
| JUN         | 0.9400                                                              | 0.7930                                                              | 3.56                                                                     | 2.97                                                                     | 1.92E-03                                                             | 7.40E-03                                                             | ENSG00000177606       |
| HSPD1       | 0.3260                                                              | 0.3710                                                              | 3.20                                                                     | 3.61                                                                     | 4.39E-03                                                             | 1.71E-03                                                             | ENSG00000144381       |
| RAP1B       | 0.1410                                                              | 0.1490                                                              | 2.41                                                                     | 2.52                                                                     | 2.55E-02                                                             | 2.00E-02                                                             | ENSG00000127314       |
| ITGA6       | -0.1920                                                             | -0.2220                                                             | -2.63                                                                    | -3.01                                                                    | 1.59E-02                                                             | 6.86E-03                                                             | ENSG00000091409       |
| UQCRB       | -0.2250                                                             | -0.3140                                                             | -2.62                                                                    | -3.62                                                                    | 1.62E-02                                                             | 1.66E-03                                                             | ENSG00000156467       |
| BID         | -0.3540                                                             | -0.3250                                                             | -4.39                                                                    | -3.99                                                                    | 2.70E-04                                                             | 7.00E-04                                                             | ENSG00000015475       |
| CYCS        | -0.3770                                                             | -0.3480                                                             | -3.51                                                                    | -3.22                                                                    | 2.13E-03                                                             | 4.20E-03                                                             | ENSG00000172115       |
| DSP         | -0.5520                                                             | -0.5600                                                             | -3.04                                                                    | -3.05                                                                    | 6.39E-03                                                             | 6.18E-03                                                             | ENSG00000096696       |
| BCL2L1      | -0.3930                                                             | -0.3800                                                             | -3.32                                                                    | -3.19                                                                    | 3.32E-03                                                             | 4.55E-03                                                             | ENSG00000171552       |
| ADRB1       | -0.3660                                                             | -0.5650                                                             | -2.61                                                                    | -4.00                                                                    | 1.65E-02                                                             | 6.90E-04                                                             | ENSG00000043591       |
| CCND1       | 0.5910                                                              | 0.6250                                                              | 2.95                                                                     | 3.09                                                                     | 7.88E-03                                                             | 5.71E-03                                                             | ENSG00000110092       |

Table S5: The expression features of 9 overlapped target genes of miR-654-5p

| <b>Gene</b> | <b>log2FC ICM<br/>Heart Failure -<br/>Non-Failing<br/>Postnatal</b> | <b>log2FC DCM<br/>Heart Failure -<br/>Non-Failing<br/>Postnatal</b> | <b>t-statistic ICM<br/>Heart Failure -<br/>Non-Failing<br/>Postnatal</b> | <b>t-statistic DCM<br/>Heart Failure -<br/>Non-Failing<br/>Postnatal</b> | <b>P Value ICM<br/>Heart Failure -<br/>Non-Failing<br/>Postnatal</b> | <b>P Value DCM<br/>Heart Failure -<br/>Non-Failing<br/>Postnatal</b> | <b>Ensembl GeneID</b> |
|-------------|---------------------------------------------------------------------|---------------------------------------------------------------------|--------------------------------------------------------------------------|--------------------------------------------------------------------------|----------------------------------------------------------------------|----------------------------------------------------------------------|-----------------------|
| BCL2L1      | -0.3930                                                             | -0.3800                                                             | -3.32                                                                    | -3.19                                                                    | 3.32E-03                                                             | 4.55E-03                                                             | ENSG00000171552       |
| ADRB1       | -0.3660                                                             | -0.5650                                                             | -2.61                                                                    | -4.00                                                                    | 1.65E-02                                                             | 6.90E-04                                                             | ENSG00000043591       |
| CCND1       | 0.5910                                                              | 0.6250                                                              | 2.95                                                                     | 3.09                                                                     | 7.88E-03                                                             | 5.71E-03                                                             | ENSG00000110092       |
| FOS         | 2.7900                                                              | 1.8070                                                              | 3.47                                                                     | 2.22                                                                     | 2.39E-03                                                             | 3.77E-02                                                             | ENSG00000170345       |
| TPM3        | 1.3260                                                              | 1.2130                                                              | 2.95                                                                     | 2.67                                                                     | 7.79E-03                                                             | 1.44E-02                                                             | ENSG00000143549       |
| HSP90AB1    | 0.3350                                                              | 0.3790                                                              | 3.04                                                                     | 3.41                                                                     | 6.38E-03                                                             | 2.75E-03                                                             | ENSG00000096384       |
| CYBA        | -0.2950                                                             | -0.2620                                                             | -2.46                                                                    | -2.17                                                                    | 2.29E-02                                                             | 4.24E-02                                                             | ENSG00000051523       |
| NDUFB10     | -0.3770                                                             | -0.2410                                                             | -3.67                                                                    | -2.32                                                                    | 1.47E-03                                                             | 3.06E-02                                                             | ENSG00000140990       |
| TPM2        | -0.5420                                                             | -0.6870                                                             | -2.12                                                                    | -2.66                                                                    | 4.65E-02                                                             | 1.49E-02                                                             | ENSG00000198467       |

Figure S1

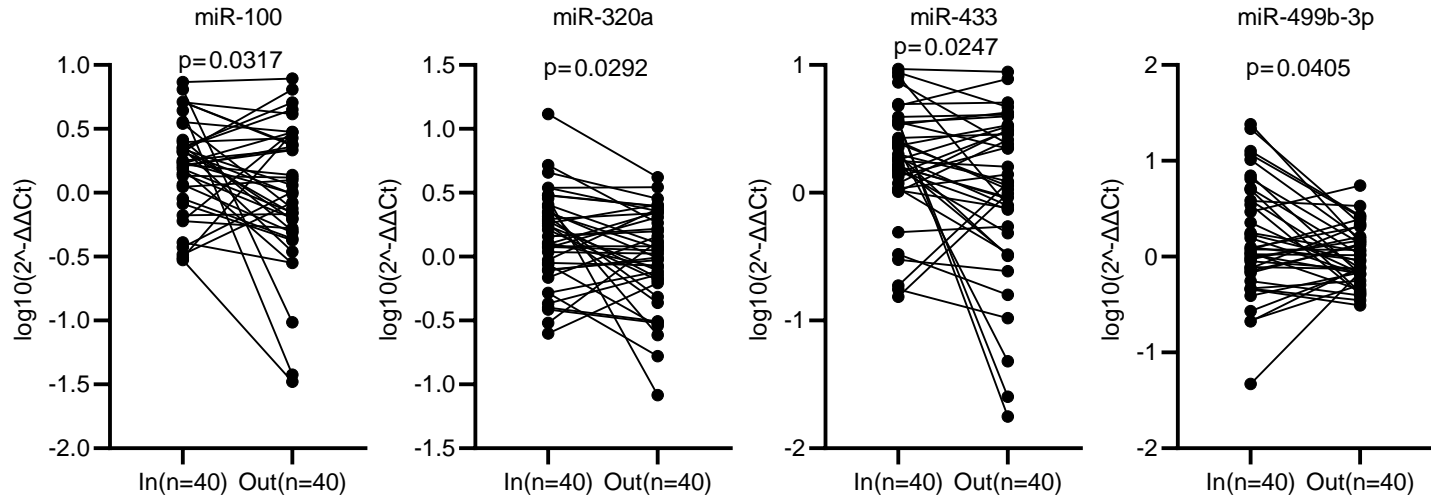

Figure S2

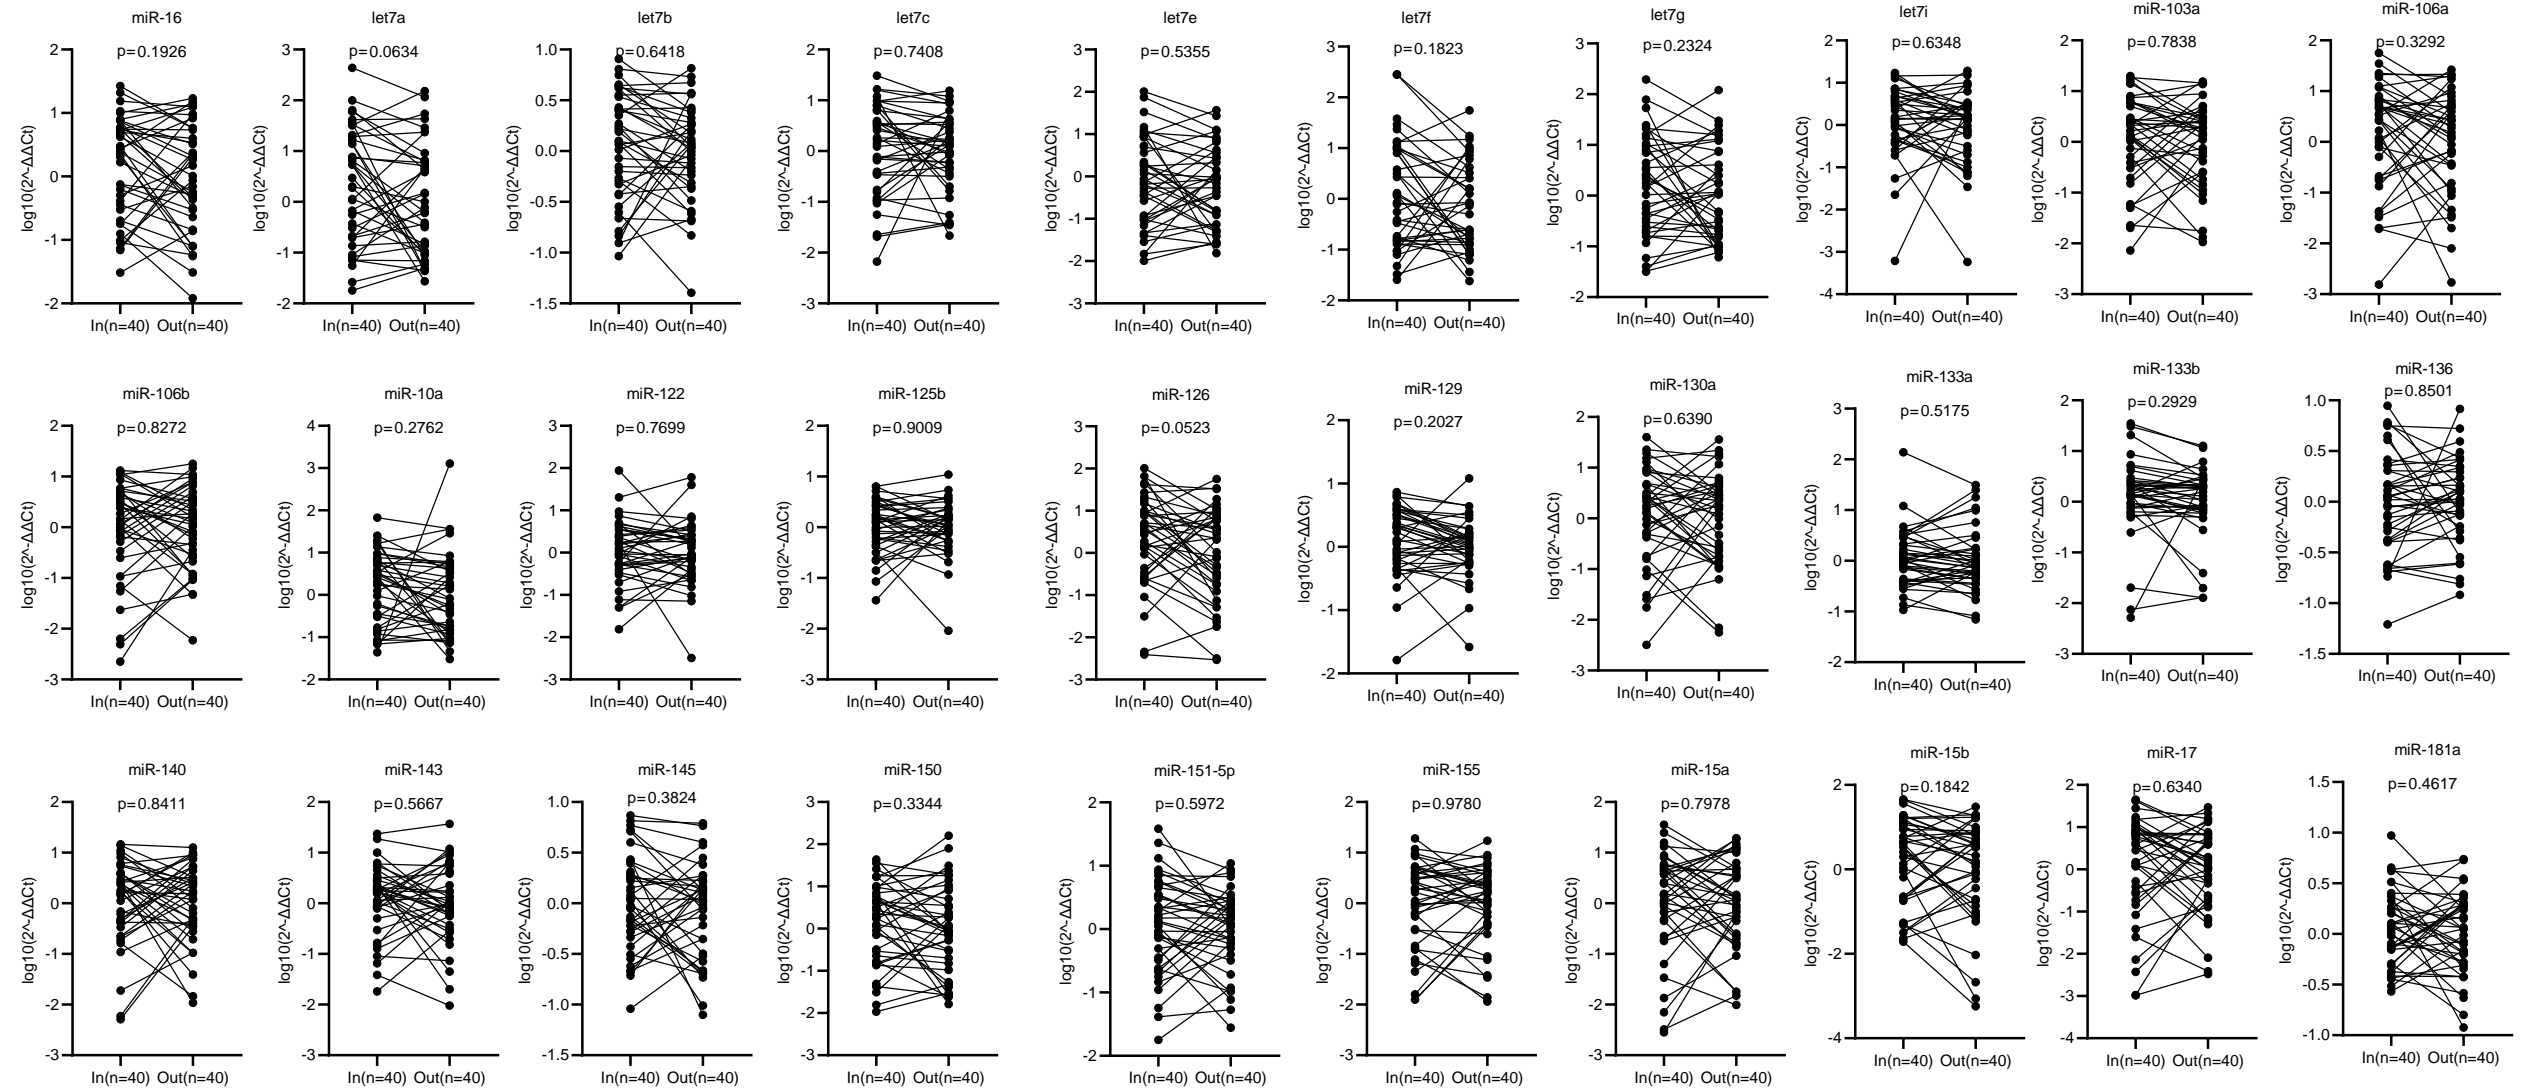



# S2-continued

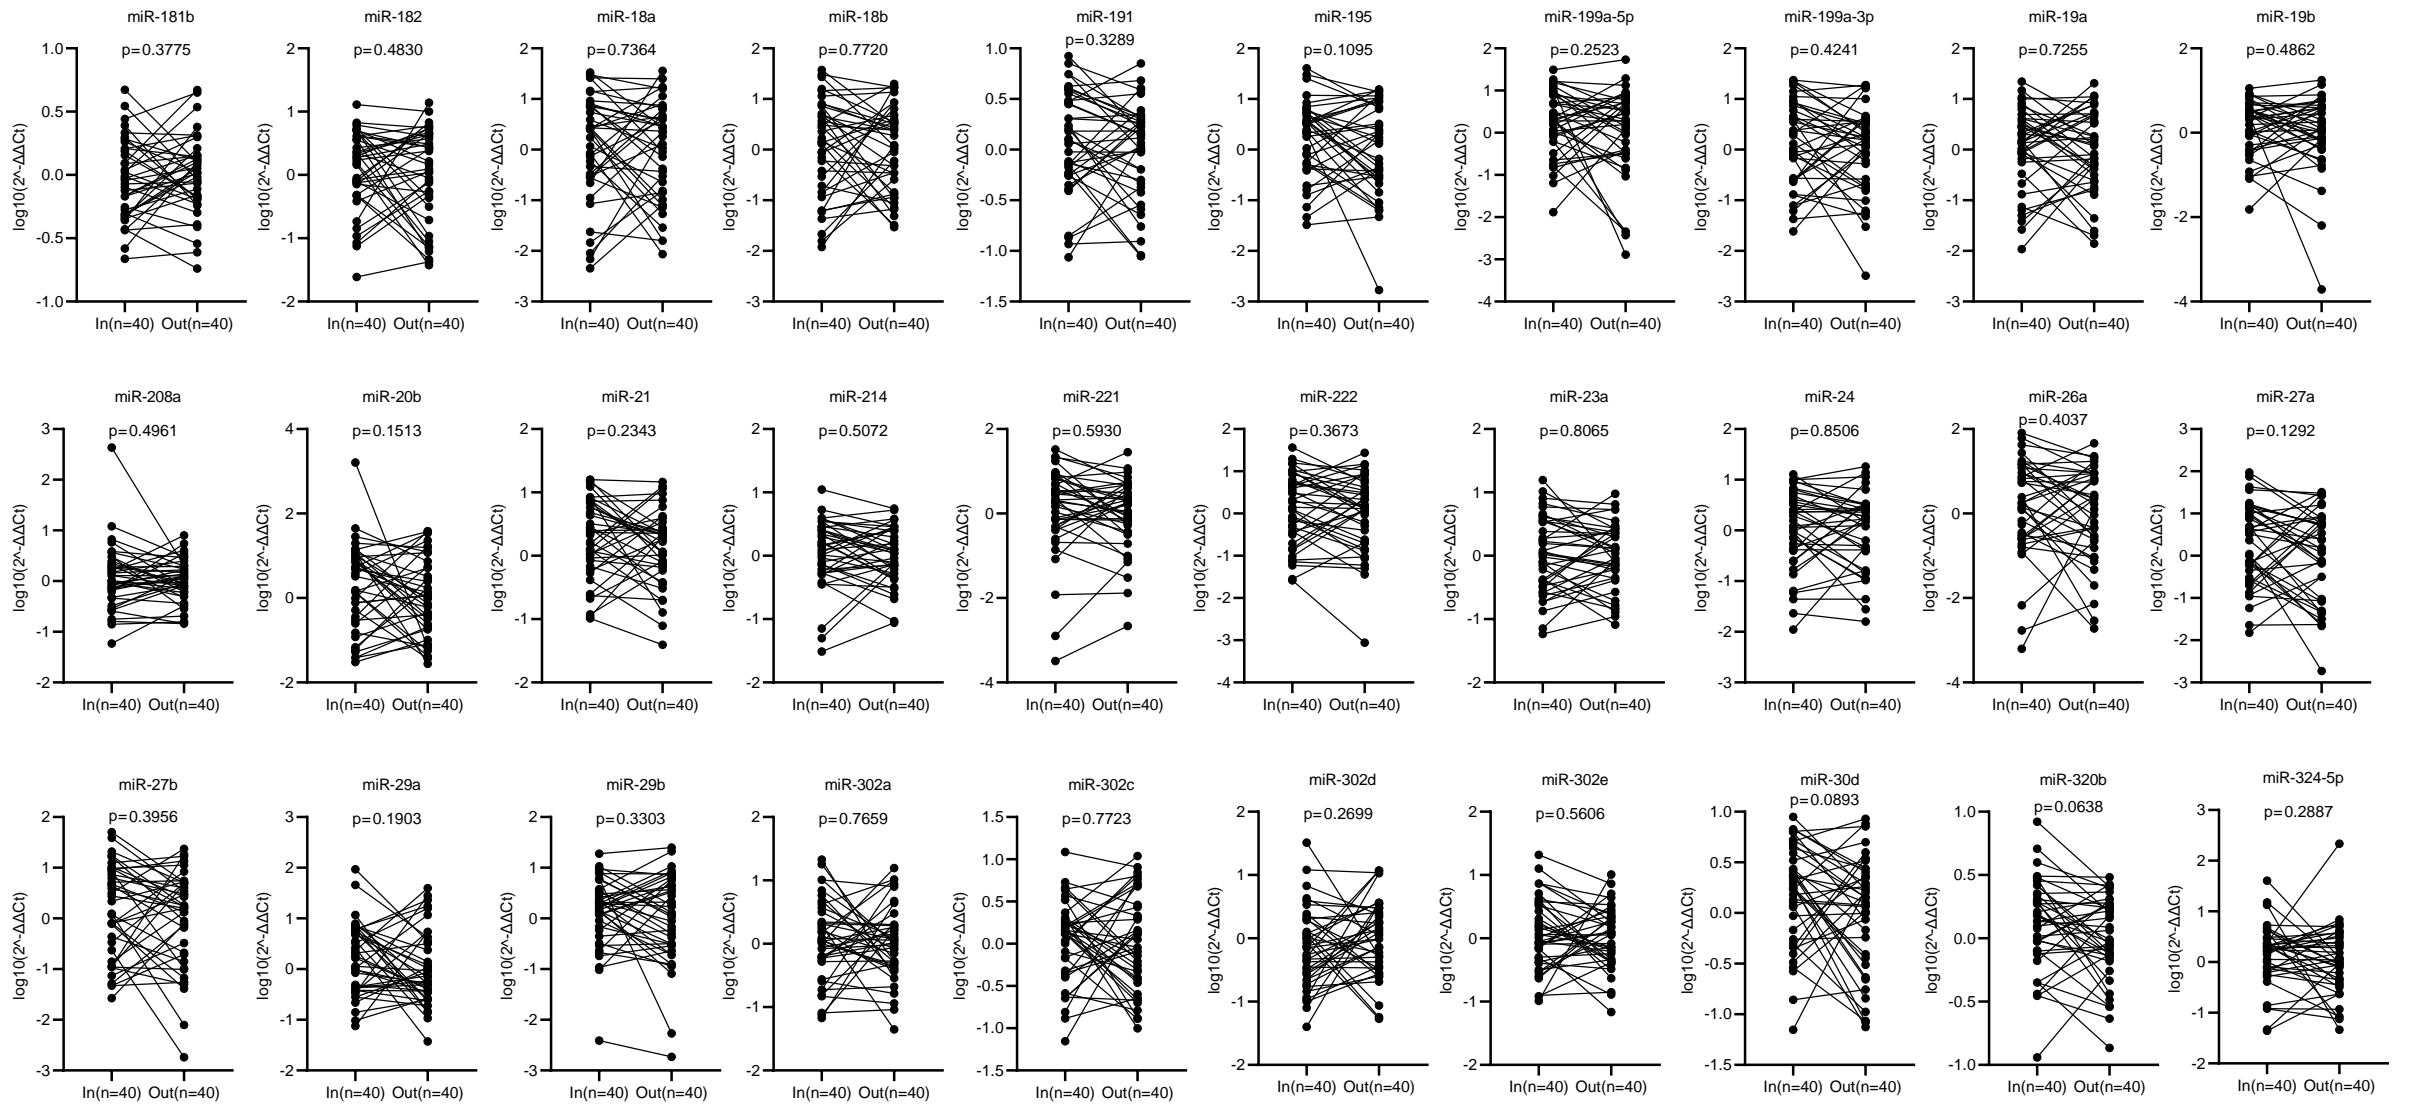

Figure S2-continued

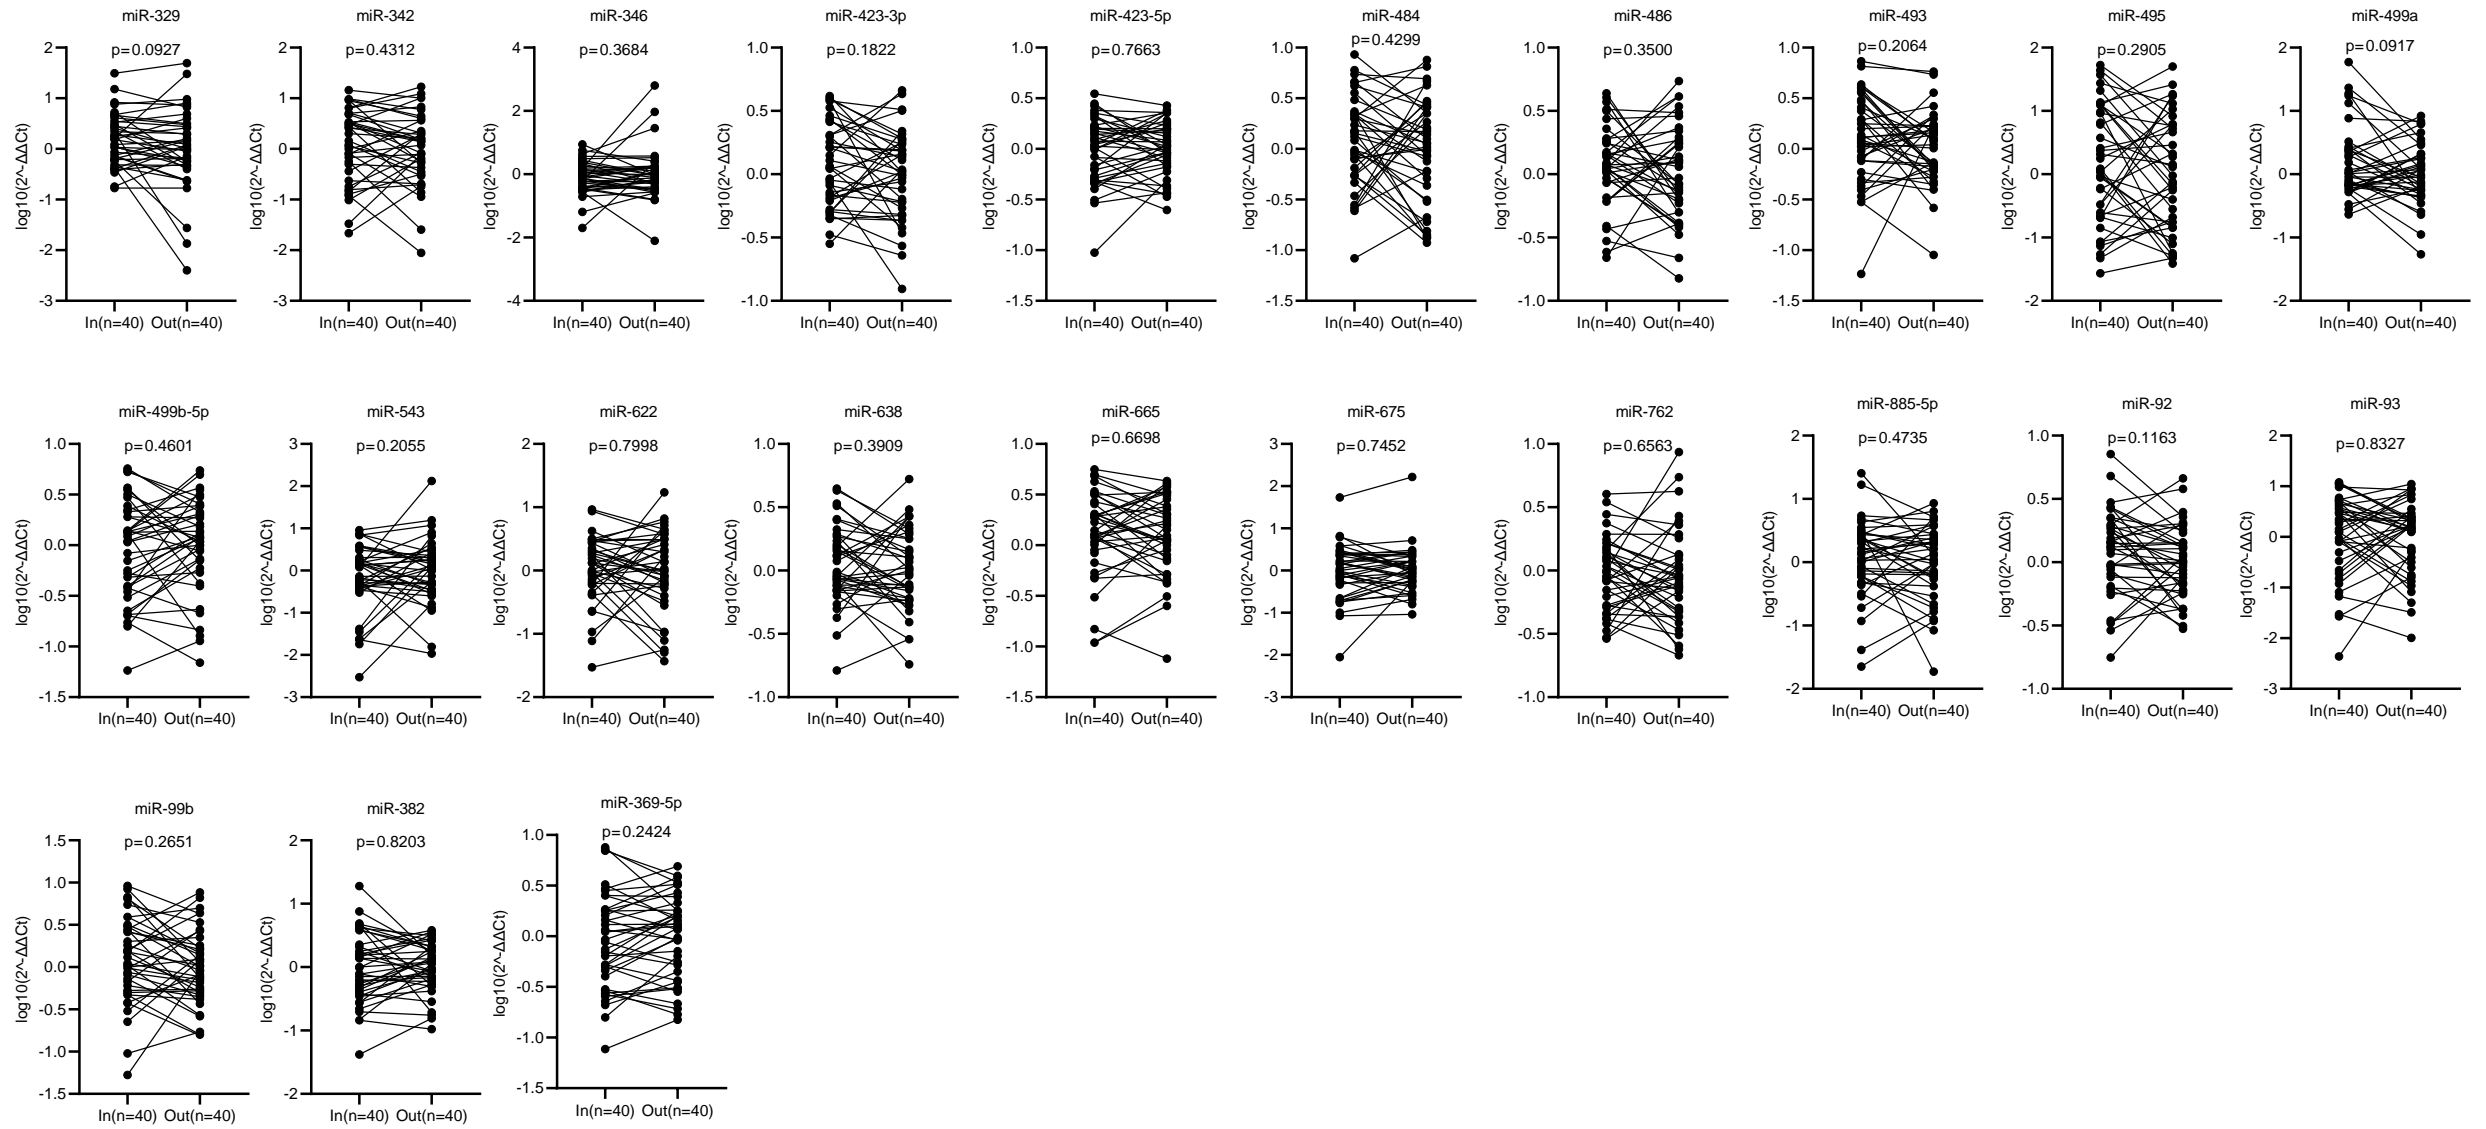

Figure S3

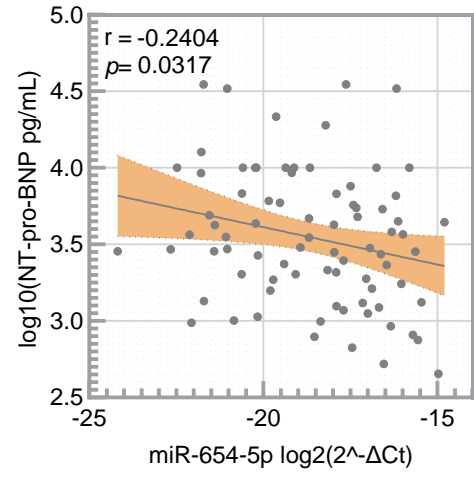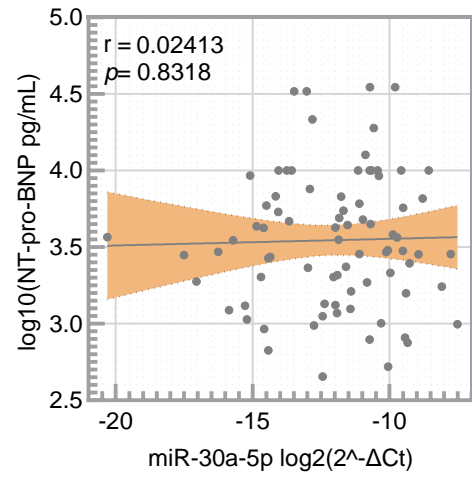

Figure S4

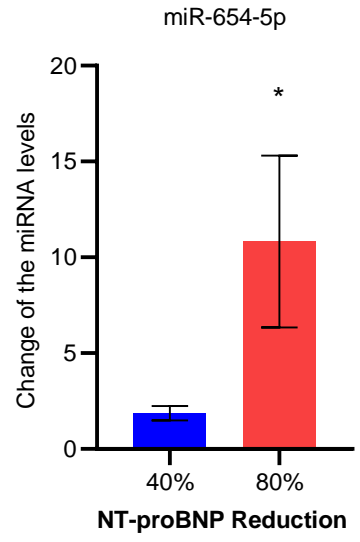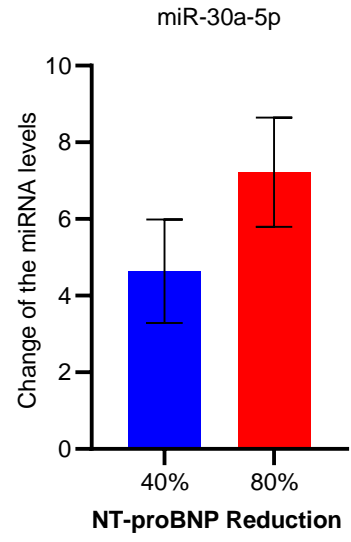

Supplement: MOESM1 [file 23152372]
